# Supplementary material
Source: PubMed Central journal article supplement (PMC4060512)

## Supplement

### **Hypochlorite-modified high-density lipoprotein acts as a sink for myeloperoxidase in vitro**

Gunther Marsche<sup>1\*</sup>, Paul G. Furtmüller<sup>2</sup>, Christian Obinger<sup>2</sup>, Wolfgang Sattler<sup>1</sup>, Ernst Malle<sup>1</sup>

<sup>1</sup> Medical University of Graz, Center of Molecular Medicine, Institute of Molecular Biology and Biochemistry, Graz, Austria

<sup>2</sup> BOKU - University of Natural Resources and Applied Life Sciences, Department of Chemistry, Division of Biochemistry, Vienna, Austria

\* Present address:

Medical University of Graz, Center for Theoretical-Clinical Medicine II, Institute of Experimental and Clinical Pharmacology, Graz, Austria

## **Figure I**

### **Structural features of lipoprotein-associated MPO:**

Circular dichroism (CD) spectra of MPO incubated with HDL (**A, C**) or HOCl-HDL (**B, D**). (**A, B**) Far-UV CD spectra of 0.1 mg MPO mixed with 0.25 mg/ml HDL (**A**) or HOCl-HDL (200:1) (**B**) in 10 mM PBS (pH 7.4) and 25°C. Path length: 1 mm. (**C, D**) Visible spectra of 0.5 mg MPO mixed with 1.0 mg/ml HDL (**C**) or 0.25 mg MPO mixed with 1.0 mg/ml HOCl-HDL (200:1) (**D**) in 10 mM PBS (pH 7.4) and 25°C. Path length: 10 mm. For details see Methods section. mdeg = milli degree.

**Supplemental Figure I,  
Marsche et al.**

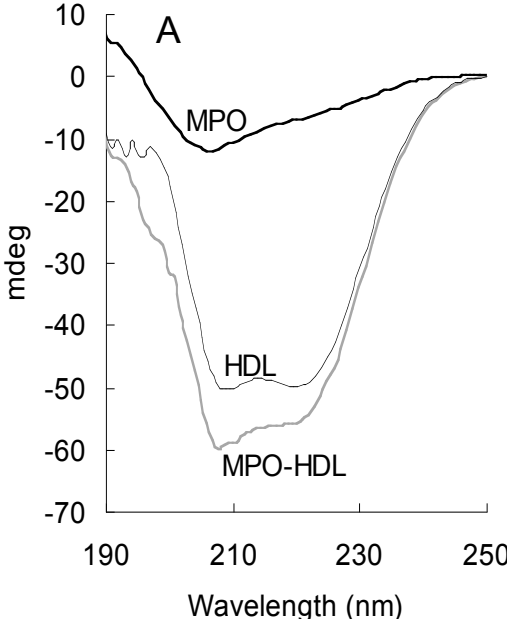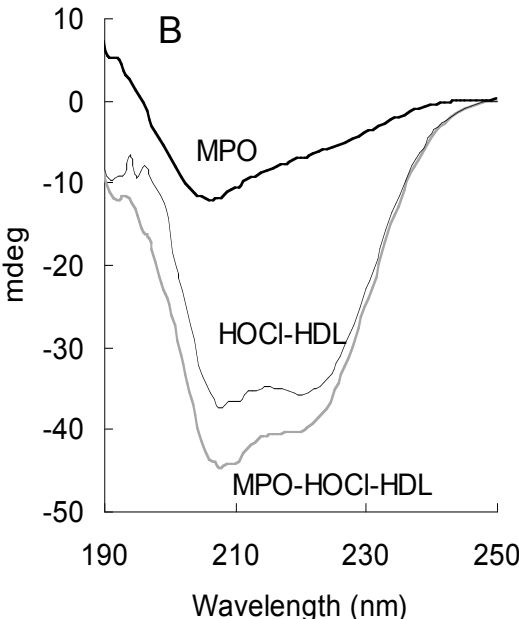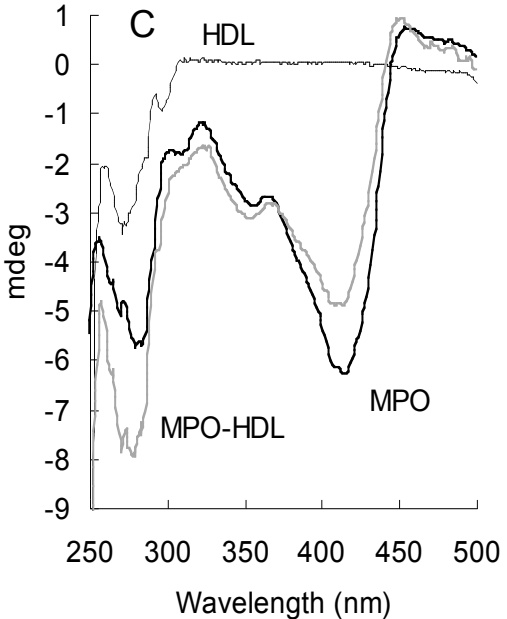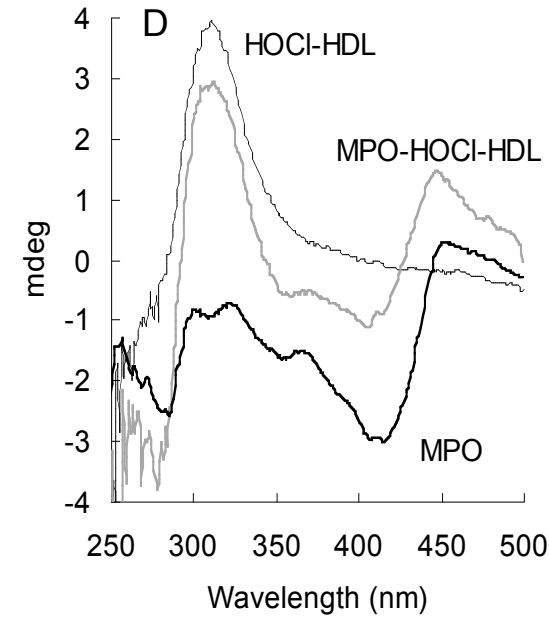

Supplement: NIHMS34546-supplement-Suppl_Marsche_2008.pdf [file NIHMS34546-supplement-Suppl_Marsche_2008.pdf]
